# Supplementary material for: Intensive care of patients with [infarct-related] cardiogenic shock: Abridged version of the S1 guideline
Source: Med Klin Intensivmed Notfmed. 2022 Aug 30;117(Suppl 2):25–36. [Article in German] doi: 10.1007/s00063-022-00945-1 (PMC9468128; doi:10.1007/s00063-022-00945-1)
Supplement: Supplementary file 1 [file 63_2022_945_MOESM1_ESM.pdf]

# Online-Zusatzmaterial

## Anhang 1 - Ablaufschema ZNA

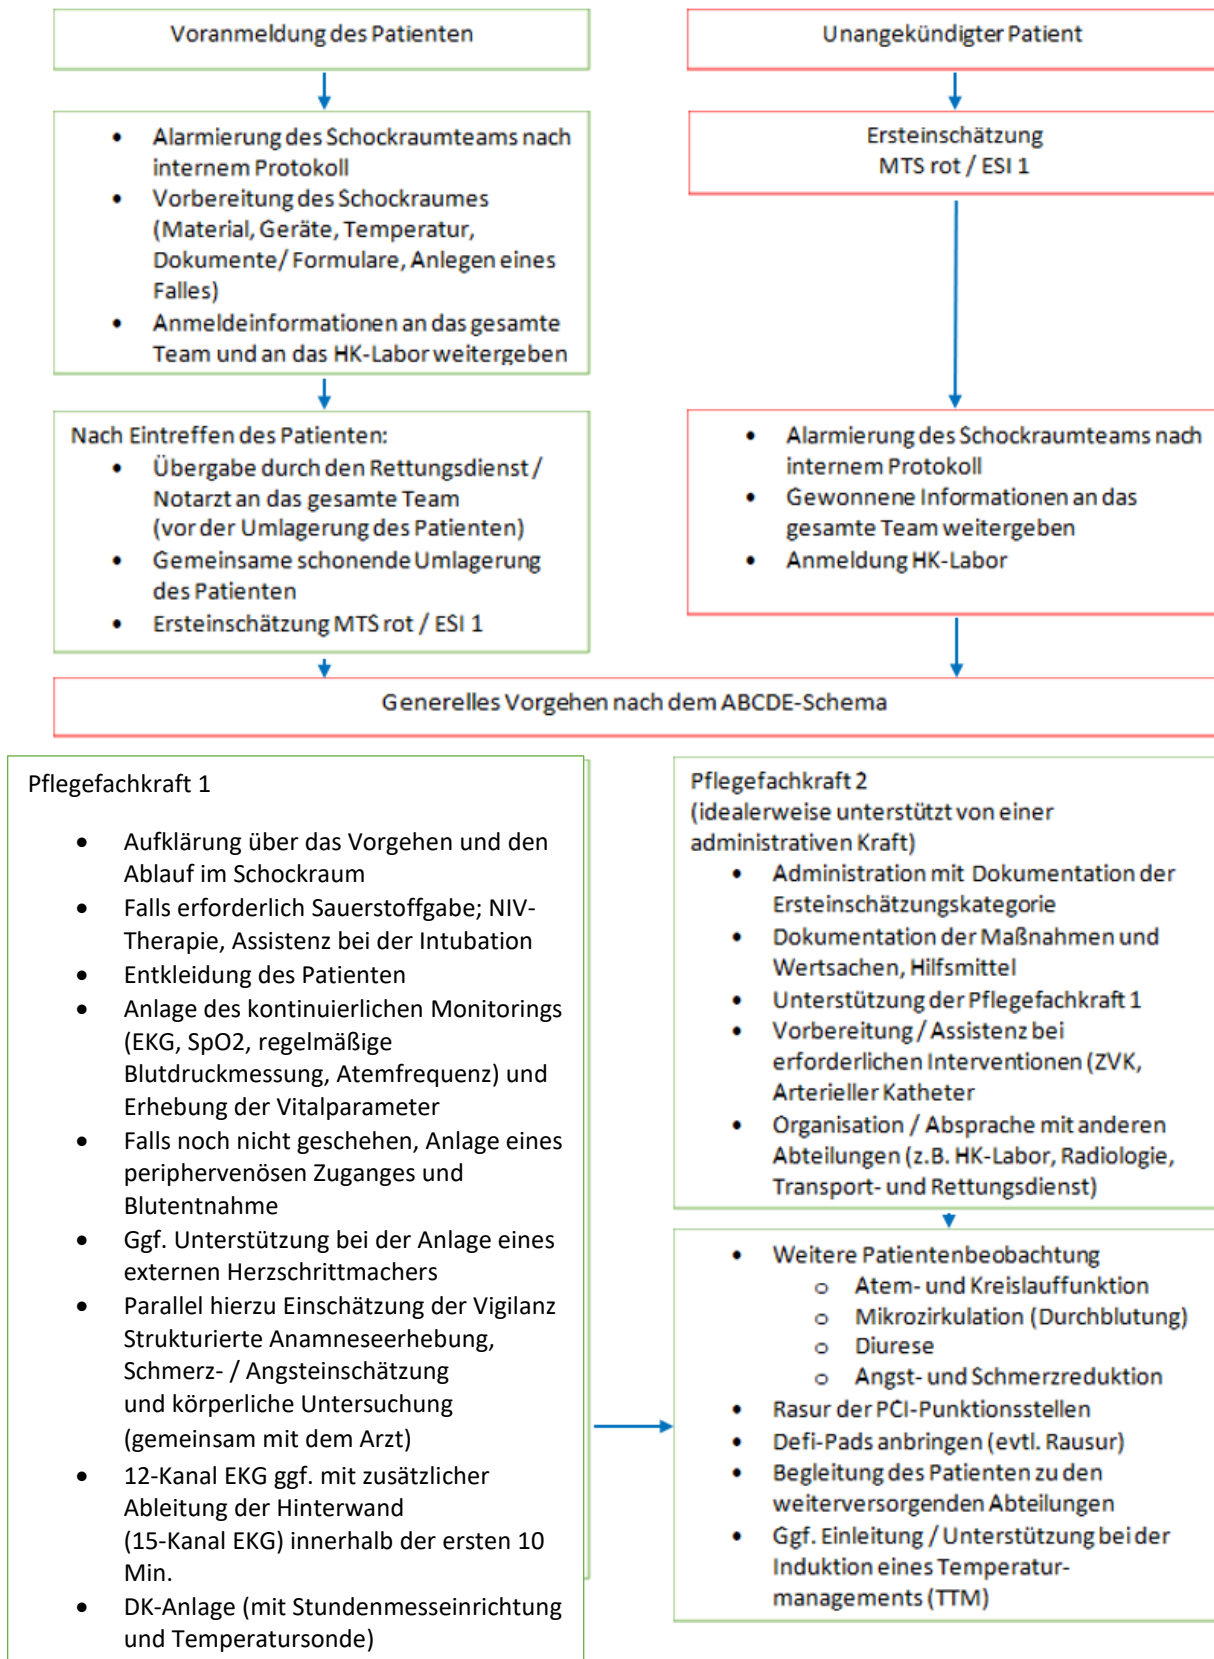

## Anhang 2 - Flowchart ABCDE(F)-Schema

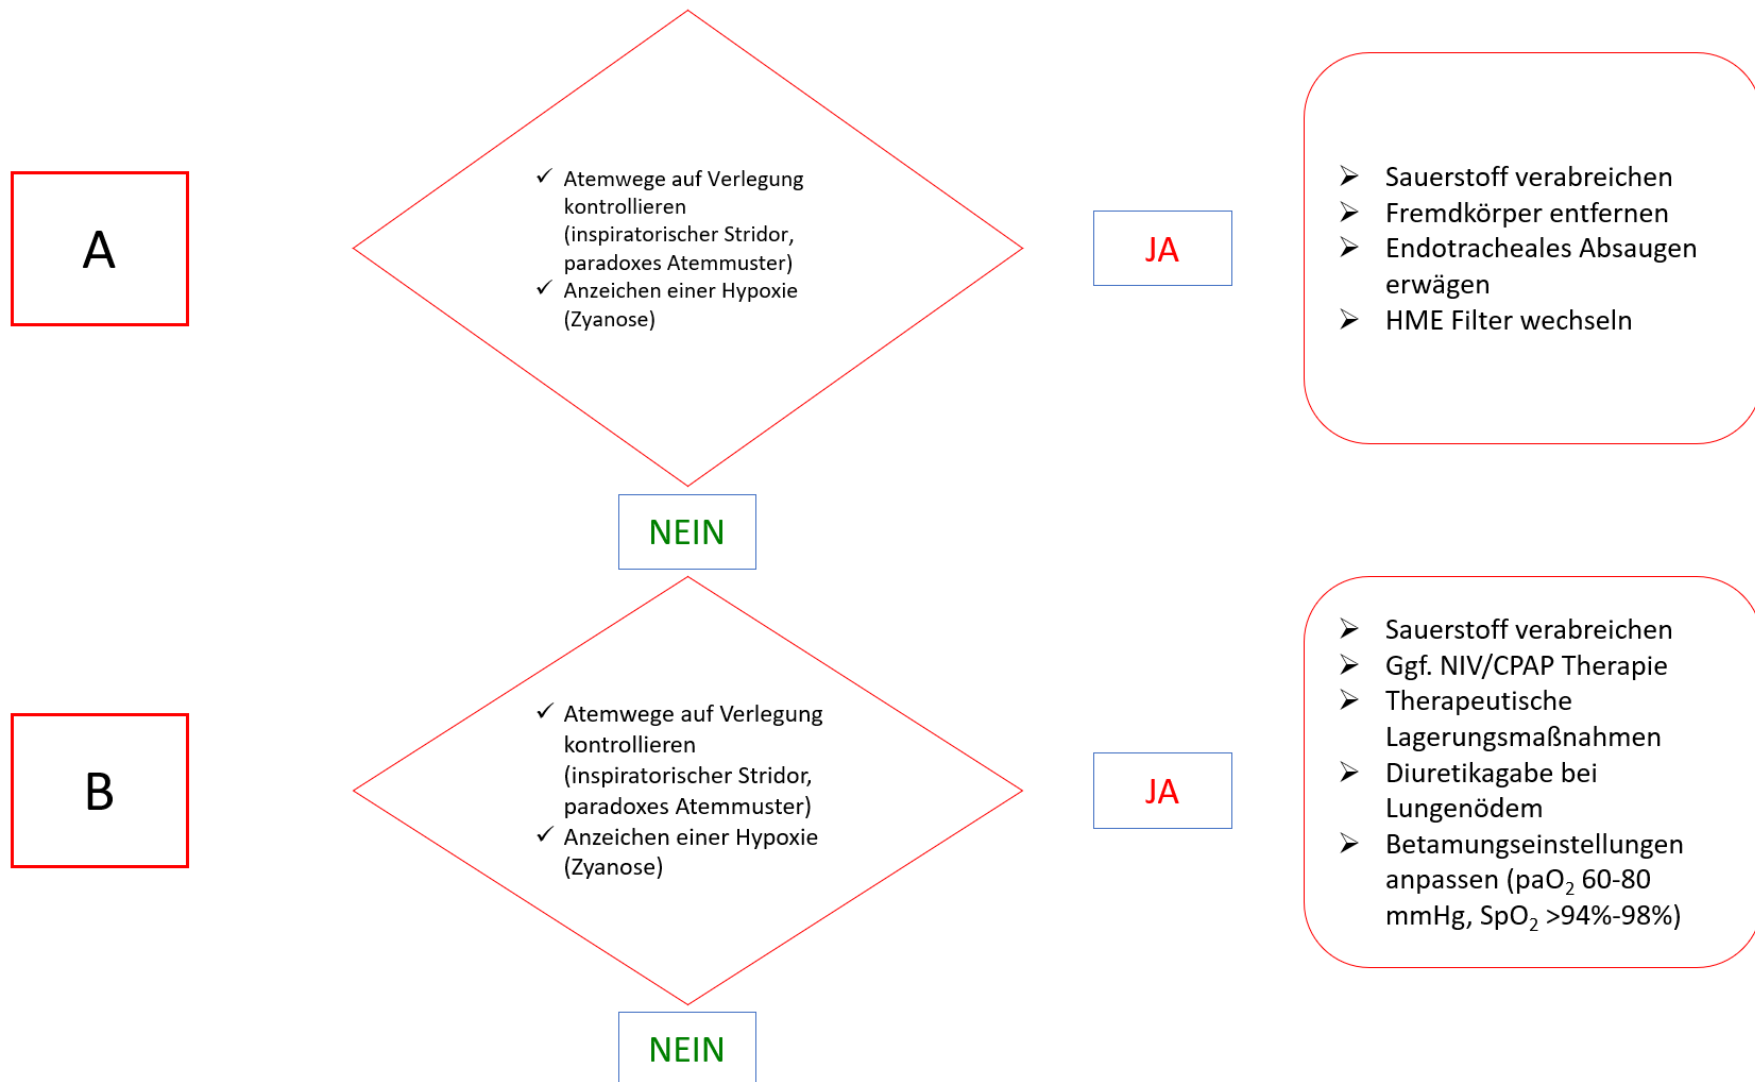

C

- ✓ Schocksymptomatik (Blässe, Kaltschweißigkeit, Rekap >2sec.)
- ✓ Urinausscheidung (< 30ml/h)
- ✓ Laktatwerte > 2,0mmol/l (> 18mg/dl)
- ✓ MAP < 65mmHg
- ✓ Auffälligkeiten im 12-Kanal-EKG
- ✓ ACS Symptomatik

JA

- Katecholamintherapie mit Zielwert MAP > 65mmHG
- Vorsichtige Volumengabe 500-1000ml
- ZVK Anlage
- Defibrillator in Reichweite

NEIN

D

- ✓ Einschränkungen in der Vigilanz
- ✓ Auffälligkeiten in der Pupillenreaktion
- ✓ Blutzucker außerhalb des Zielwertes < 150mg/dl

JA

- Anpassung der Analgosedierung
- Blutzuckersteuerung Zielwert < 150mg/dl

NEIN

E

- ✓ Anzeichen kardialer Dekompensation (Ödeme, Marmorierung der Haut)
- ✓ Lagerung
- ✓ Temperatur

JA

- Lagerung optimieren (30° Oberkörperhoch)
- Temperaturmanagement (siehe Kapitel 4.6.)

NEIN

F

- ✓ Patientensicherheit gewährleisten – Technische Fehler ausschließen

JA

- Regelmäßige Kontrolle der apparativen Überwachungsmaßnahmen sowie der Zu- und Abgänge der Patienten

## SBAR - ÜBERGABESCHEMA

### SITUATION

- Name
- Alter
- Geschlecht
- Hauptdiagnose/ Aufnahmediagnose/ Eingriff/ Behandlungstag
- Besonderheiten in der Kommunikation (Schwerhörigkeit, Sehschwäche, Sprachbarriere)
- bestehende Therapielimitationen (Patientenverfügung, DNR/DNI, VaW)

### BACKGROUND

- Vorerkrankungen
- Was ist akut, was chronisch? Was ist bekannt, was ist neu?
- Ernährung
- Medikation
- Soziale Situation (Angehörige, Vorsorgebevollmächtigte, Betreuer:in?)

### ASSESSMENT

|             |                                                                                             |
|-------------|---------------------------------------------------------------------------------------------|
| AIRWAY      | Spontan, HFNC, NIV, intubiert, tracheotomiert (kontinuierlich/ intermittierend)             |
| BREATHING   | O <sub>2</sub> -Bedarf, Beatmungseinstellungen, Weaningprocedere                            |
| CIRCULATION | Katecholamine, Volumenstatus, Diurese, Organunterstützung (ECLS, CRRT, andere)              |
| DISABILITY  | Delir, Orientierung, Sedierung/ Sedierungstiefe, Schmerz, BZ                                |
| EXPOSURE    | Hautzustand (inkl. Wunden/ Decubitalulcera), Ernährungsstatus, Mobilisation, Pflegeprobleme |

### RECOMMENDATION

- Bisherige Untersuchungen und Ergebnisse
- Geplante Maßnahmen
- Tagesziele, weitere Ziele

## CHECKLISTE ANTRITTSKONTROLLE

### PATIENT

- Identität prüfen
- Assessments: Vigilanz, Schmerz, Delir, Orientierung
- Auskultation Pulmo und Abdomen
- Neurologisches Assessment: Pupillenkontrolle, Sensibilität, Arm- & Beinkraft
- Fußpulse nach Katheterintervention & bei femoraler Punktion/ Kanülierung
- Inspektion der Haut & Schleimhaut (Kolorit, Turgor)
- Sichtkontrolle der Verbände/ Druckverband
- Kontrolle von ggf. Fixierungen und Bettgittern (inkl. Anordnung und Verlaufsbogen)

### BETTPLATZ

- Kontrolle auf Vollständigkeit (interne Checkliste empfohlen)
- Kontrolle der Absaugvorrichtung auf Vollständigkeit und Funktionstüchtigkeit (Sogstärke, Absaugkatheter verschiedener Größen, Handschuhe, Mundschutz)
- Kontrolle des Bettes auf Erdung & Stromversorgung

### MEDIKAMENTE

- Kontrolle der Laufraten
- Kontrolle der Konzentrationen und Kompatibilitäten
- Kontrolle der Konnektion der Leitungen, Filter & Dreiwegehähne
- Richtige Zuordnung am jeweiligen Zugang nach einheitlichem hauseigenen Standard
- Kontrolle der Stromversorgung bei Spritzen- & Infusionspumpen

### MONITORING

- Monitoring komplett? (EKG, NIBP/IBP, SpO<sub>2</sub>, Temperatur)
- Hygienischer Nullabgleich invasiver Druckmessungen, auf stationseinheitliche Skalierung der Kurven achten, Transducer-Position prüfen, Druckbeutel prüfen (300mmHg)
- Kontrolle der Messintervalle, Alarmgrenzen & Alarmlautstärke
- Kontrolle erweitertes Monitoring (PiCCO, PAK, NIRS)
- BGA (art./ven.) zur Kontrolle des respiratorischen und metabolischen Verlaufs

# CHECKLISTE ANTRITTSKONTROLLE

## GERÄTE

Bei allen verwendeten Geräten ist auf die Sicherstellung der kontinuierlichen Energiezufuhr und die Erdung zu achten. Alle Geräte, die ein Organ unterstützen/ersetzen, müssen zwingend an eine unterbrechungsfreie Notstromversorgung angeschlossen sein. Zudem muss im Rahmen der Antrittskontrolle das Vorhandensein des notwendigen Notfallequipments für die laufenden Therapieverfahren überprüft werden.

- |                   |   |                                                                                                                                                                                                                                                                                                |
|-------------------|---|------------------------------------------------------------------------------------------------------------------------------------------------------------------------------------------------------------------------------------------------------------------------------------------------|
| Beatmung          | → | Modus, Einstellungen, Alarmgrenzen, Befeuchtung, Handbeatmungsbeutel vorhanden?, Tubuslage, Cuffdruckkontrolle, bei TK: Ersatzkanülen/ Trachealspreizer                                                                                                                                        |
| CRRT              | → | Therapieeinstellungen, Alarmgrenzen, Dosierung der Antikoagulation, Sichtkontrolle der blutführenden Leitungen und des Filters, korrekte und zugfreie Fixierung, Einsatzdauer                                                                                                                  |
| ECLS              | → | Therapieeinstellungen, Alarmgrenzen, Vollständigkeit Notfallequipment, Sichtkontrolle der blutführenden Leitungen, der Pumpe und des Oxygenators, Flushen des Oxygenators, Kontrolle Oberschenkelumfang/ periphere Durchblutung, korrekte & zugfreie Fixierung, ggf. pre/post - Oxygenator-BGA |
| Impella           | → | Kontrolle P-Level, Platzierungssignal & Motorstromkurve, korrekte Konzentration der Purge - Lösung, feste Verriegelung des Tuohy-Borst-Ventils, periphere Durchblutung, korrekte & zugfreie Fixierung                                                                                          |
| Herzschrittmacher | → | Kontrolle Modus, Frequenz, feste Verriegelung des Tuohy-Borst-Ventils, korrekte & zugfreie Fixierung, Pacer-Erkennung in Monitor aktiviert                                                                                                                                                     |

## ZU- & ABLEITUNGEN

- Prüfung auf korrekte Lage und Sichtkontrolle der Eintrittsstellen & Verbände
- Gewährleistung von Zugfreiheit bei den Leitungen
- Kontrolle und Beurteilung der Diurese, ggf. Stuhlgang
- Kontrolle von Sogeeinstellungen und Sekretmenge/ Beschaffenheit bei Drainagen
- Lage- & Refluxkontrolle bei einliegender Magensonde, Art & Laufrate der Sondennahrung

## CHECKLISTE ECLS

### PATIENT

- ☐ Pupillenreaktion initial stündlich, nach 24h 2-stdl.
- ☐ Lagerung des Kopfes
- ☐ Kontrolle der Kanülenfixierung
- ☐ Verbandskontrolle
- ☐ mind. 2-stdl. Dokumentation der NIRS - Parameter
- ☐ Aussehen des Beines / Umfangsdifferenz / Sensorik / Motorik mind. 8-stdl.
- ☐ Kontrolle der Fußpulse initial stündlich, nach 24h 4-stdl.
- ☐ Erfassung von Vigilanz, Schmerz, Delir mind. 8-stdl.

### GERÄT

- ☐ Sichtkontrolle des gesamten Schlauchsystems auf Abknickungen, Beschädigungen, Thrombenbildung, korrekte Konnektion, Farbdifferenz
- ☐ Kontrolle der korrekten Lage und zugfreien Fixierung
- ☐ Sichtkontrolle des Oxygenators auf Thrombenbildung mittels Taschenlampe
- ☐ Oxygenator flushen für max. 10 sec.
- ☐ Oxygenator unter Patientenniveau positionieren
- ☐ Kontrolle der Geräteparameter (Umdrehungszahl/Blutfluss, Systemdrücke, SvO<sub>2</sub>)
- ☐ Kontrolle des Gasblenders (Gasfluss, FiO<sub>2</sub>)
- ☐ Kontrolle der Alarmgrenzen und Alarmlautstärke
- ☐ Kontrolle des Wärmetauschers (Wasserstand, zirkulierendes Rädchen)
- ☐ Notantrieb (Handkurbel) am Gerät
- ☐ Sicherer Stand des Gerätes – Bremsen festgestellt
- ☐ Stromanschluss in Notstromsteckdose
- ☐ 2 Schlauchklemmen pro Kanüle am Bett
- ☐ Notfallmedikamente nach Hausstandard vorbereitet am Bett
- ☐ EK's auf Abruf in Blutbank oder auf Station

## PATIENTENBEZOGENE KONTROLL-PARAMETER DER ECLS-THERAPIE

(Boeken et al., 2020)

| PARAMETER                                                               | KONTROLLINTERVALL                                                                            | ZIELBEREICH                                                                        |
|-------------------------------------------------------------------------|----------------------------------------------------------------------------------------------|------------------------------------------------------------------------------------|
| Mittlerer arterieller Blutdruck                                         | kontinuierlich                                                                               | >60 mmHg                                                                           |
| Pulskurve arteriell                                                     | kontinuierlich                                                                               | pulsatil                                                                           |
| Rekapillarierungszeit                                                   | 1-8 stündlich                                                                                | < 3 s                                                                              |
| Extremitätenperfusion<br>(insbesondere arteriell kanülierte Extremität) | Kontinuierlich NIRS<br><br>Diskontinuierlich klinisch (1x pro Schicht) + Doppler 6-stündlich | ähnlich zur nicht arteriell kanülierten Seite<br><br>warm, rosig, Puls nachweisbar |
| Zentralvenöser Druck                                                    | Diskontinuierlich bei Bed.                                                                   | Relative Beurteilung                                                               |
| Zerebrale Oxygenierung                                                  | Kontinuierlich NIRS                                                                          | Individuell verschieden, keine signifikanten Abfälle                               |
| Diurese Stündlich                                                       | >0.5ml/kg KG                                                                                 | pro Stunde                                                                         |
| (Zentral)venöse Sättigung                                               | Mind. 12stündlich                                                                            | ScvO <sub>2</sub> ≥ 60%<br>SvO <sub>2</sub> ≥ 65%                                  |
| paO <sub>2</sub>                                                        | 4-stündlich                                                                                  | 60 – 90 mmHg                                                                       |
| SpO <sub>2</sub>                                                        | Kontinuierlich                                                                               | 95 – 98%                                                                           |
| Kapnographie<br>paCO <sub>2</sub>                                       | Kontinuierlich<br>4-stündlich                                                                | Individuell nach Gap zum paCO <sub>2</sub>                                         |
| pH                                                                      | 4-stündlich                                                                                  | 7,35 – 7,45                                                                        |
| Laktat-Plasmakonzentration                                              | Mind. 4-stündlich                                                                            | ≤2 mmol/l                                                                          |
| Activated Clotting Time (ACT)                                           | 3-stündlich<br>(bei stabilen Verhältnissen 6-stündlich)                                      | 160 – 180 Sekunden                                                                 |
| aPTT                                                                    | 4-6-stündlich bis stabil, dann 1x täglich                                                    | 1.5-2x Referenzbereich                                                             |
| Temperatur                                                              | Kontinuierlich (mind. 4 - stündlich)                                                         |                                                                                    |
| Echokardiographie                                                       | 1x täglich und bei Bed.                                                                      |                                                                                    |
| EKG                                                                     | Kontinuierlich                                                                               | Keine HRST, HF >40/min und <120/min                                                |
